# Supplementary material for: Adult liver transplantation: A UK clinical guideline - part 1: pre-operation
Source: HighWire-hosted journal article supplement (doi:10.1136/flgastro-2019-101215), 2020-02-25
Supplement: flgastro-2019-101215supp001_data_supplement.pdf [file flgastro-2019-101215supp001_data_supplement.pdf]

## Appendix 1: UK &amp; IRELAND TRANSPLANT CENTRES

| TRANSPLANT CENTRE | ADDRESS                                                                                                                        | Contacts                                                            |
|-------------------|--------------------------------------------------------------------------------------------------------------------------------|---------------------------------------------------------------------|
| Birmingham        | Queen Elizabeth Hospital<br>Birmingham<br>Mindelsohn Way<br>Edgbaston,<br>Birmingham B15 2GW                                   | Tel: 0121 371 4414<br>Email: hpbsurgeons@uhb.nhs.uk                 |
| Cambridge         | Cambridge University<br>Hospitals NHS Foundation<br>Trust<br>Cambridge Biomedical<br>Campus<br>Hills Road<br>Cambridge CB2 0QQ | Tel: 01223 216 672<br>Email: liver.coordinators@addenbrookes.nhs.uk |
| Dublin            | St Rita's Building<br>St Vincent's University<br>Hospital<br>Elm Park<br>Dublin 4                                              | Tel: 012214248<br>Email: Liversecretary@svuh.ie                     |
| Edinburgh         | Edinburgh Royal Infirmary<br>51 Little France Cres,<br>Edinburgh EH16 4SA                                                      | Tel: 0131 242 1721<br>Email: sltu@nhslothian.scot.nhs.uk            |
| King's            | Institute of Liver Studies<br>3rd Floor, Cheyne Wing<br>King's College Hospital<br>Denmark Hill<br>London SE5 9RS              | Tel: 020 3299 1766<br>Email: kch-tr.liveroutpatients@nhs.net        |
| Leeds             | St James's University<br>Hospital<br>Beckett Street<br>Leeds LS9 7TF                                                           | Tel: 0113 2066585<br>leedsth-tr.livertransplant@nhs.net             |
| Newcastle         | Institute of Transplantation<br>Freeman Hospital<br>Freeman Road<br>High Heaton<br>Newcastle upon Tyne NE7 7DN                 | Tel: 0191 244 8068<br>Email: tnu-tr.CadavericRenalDonor@nhs.uk      |
| Royal Free        | Pond St,<br>Hampstead,<br>London NW3 2QG                                                                                       | Tel: 020 7794 0500 ext: 36896<br>Email: rf.ltxc@nhs.net             |
