# Supplementary material for: Adult liver transplantation: A UK clinical guideline - part 1: pre-operation
Source: PubMed Central journal article supplement — Frontline Gastroenterol. 2020 Feb 25;11(5):375–84. doi: 10.1136/flgastro-2019-101215 (PMC7447286; doi:10.1136/flgastro-2019-101215), 2020-02-25
Supplement: flgastro-2019-101215supp002.pdf [file flgastro-2019-101215supp002.pdf]

## Appendix 2: Transplant Assessment Proforma

|                                                                     |              |                          |                          |                            |
|---------------------------------------------------------------------|--------------|--------------------------|--------------------------|----------------------------|
| <b>DIAGNOSIS</b>                                                    |              |                          |                          |                            |
| <b>CO-MORBIDITY</b>                                                 |              |                          |                          |                            |
| <b>BLOOD TESTS: (*within 1 month of referral)</b>                   |              |                          |                          |                            |
| Blood Group                                                         |              | BMI                      |                          | kg/m <sup>2</sup>          |
| MELD                                                                | UKELD        | C-P                      |                          | *GFR mls/min               |
| *Bil umol/L                                                         | *Alb g/L     | *ALP IU/L                | *ALT U/L                 |                            |
| *PT secs                                                            | *Hb g/L      | *PLT x10 <sup>9</sup> /L | *WBC x10 <sup>9</sup> /L |                            |
| *Creat umol/L                                                       | *Urea mmol/L | *Na <sup>+</sup> mmol/L  | *K <sup>+</sup> mmol/L   |                            |
| Ferritin ug/L                                                       | B12 ng/L     | Folate ug/L              |                          |                            |
| ANA                                                                 | AMA          | SMA                      |                          |                            |
| HBV                                                                 | HCV          | HIV                      |                          | CMV                        |
| Glucose mmol/L                                                      | tTG          | AFP kU/L                 | A1AT                     |                            |
| IgM g/L                                                             | IgA g/L      | IgG g/L                  |                          |                            |
| TSH mu/L                                                            |              | MRSA                     |                          |                            |
| *PaO <sub>2</sub> (FiO <sub>2</sub> %)                              | kPa          | *PaCO <sub>2</sub>       |                          | kPa                        |
| <b>CARDIORESPIRATORY etc:</b>                                       |              |                          |                          |                            |
| FEV1 L                                                              | FVC L        | FEV1/FVC                 |                          |                            |
| Echocardiogram: (date / / )                                         |              |                          |                          |                            |
| ECG: (date / / )                                                    |              | CXR: (date / / )         |                          |                            |
| CPEX: (date / / )                                                   |              |                          |                          |                            |
| <b>IMAGING:</b>                                                     |              |                          |                          |                            |
| USS Liver: (date / / ) Portal vein Patent Y/N, Ascites Y/N, HCC Y/N |              |                          |                          |                            |
| MRI: (date / / )                                                    |              |                          |                          |                            |
| CT: (date / / )                                                     |              |                          |                          |                            |
| <b>GASTROSCOPY:</b> (date / / )                                     |              |                          |                          |                            |
| <b>DIETICIAN:</b>                                                   |              |                          |                          |                            |
| Notes:                                                              |              |                          |                          |                            |
| Handgrip kg                                                         | MAMC cm      | RFS                      |                          |                            |
| <b>DRUG HISTORY:</b>                                                |              | <b>ALCOHOL/ADDICTION</b> |                          | <b>SOCIAL SUPPORT etc:</b> |
|                                                                     |              |                          |                          |                            |
| <b>NOTES:</b>                                                       |              |                          |                          |                            |
|                                                                     |              |                          |                          |                            |

\*\*Colonoscopy within 12 months if PSC
