# Supplementary material for: Adult liver transplantation: A UK clinical guideline - part 1: pre-operation
Source: PubMed Central journal article supplement — Frontline Gastroenterol. 2020 Feb 25;11(5):375–84. doi: 10.1136/flgastro-2019-101215 (PMC7447286; doi:10.1136/flgastro-2019-101215), 2020-02-25
Supplement: flgastro-2019-101215supp005.pdf [file flgastro-2019-101215supp005.pdf]

**Appendix 5: Co-morbidity**

| <b>CO-MORBIDITY</b>                  | <b>RELEVANCE</b>                                                                                                                                                                                                                                                                                                                                                       |
|--------------------------------------|------------------------------------------------------------------------------------------------------------------------------------------------------------------------------------------------------------------------------------------------------------------------------------------------------------------------------------------------------------------------|
| <b>Cardiovascular</b>                | Cardiomyopathy is seen with cirrhosis and alcohol. Several liver-lung syndromes (HPS/PPHT/HHT) are described. A clinical history, contrast echocardiography and other invasive tests may be necessary. Any history of cerebrovascular disease should be sought and described i.e. haemorrhagic/embolic/infarct and relevant imaging and investigations supplied.       |
| <b>Respiratory</b>                   | All respiratory disease and investigations should be described, including any ITU admissions and performance status. For hypoxic patient, include cross-sectional imaging, lung function, transfer studies and tests looking for PEs/Shunts & AVMs                                                                                                                     |
| <b>Renal</b>                         | For patients with chronic kidney disease (CKD) include investigations and treatments. If the eGFR <30mls/min/1.73m <sup>2</sup> for more than 3 months, a combined liver kidney graft may be necessary. Urinalysis, Albumin to Creatinine ration (ACR), renal ultrasound and cultures should be completed in all patients with an eGFR <60mls/min/1.73m <sup>2</sup> . |
| <b>Bone</b>                          | Assess the FRAX score in all patients ( <a href="https://www.shef.ac.uk/FRAX/tool.jsp">https://www.shef.ac.uk/FRAX/tool.jsp</a> )                                                                                                                                                                                                                                      |
| <b>HIV</b>                           | HIV on treatment, is not a contraindication to liver transplantation. Enclose details from specialist teams of treatment history, adherence and drug prescription.                                                                                                                                                                                                     |
| <b>Obesity</b>                       | Record BMI and estimate dry BMI if ascites present. BMI>40kg/m <sup>2</sup> is a relative contraindication                                                                                                                                                                                                                                                             |
| <b>Surgical/Anaesthetic</b>          | All surgical history should be detailed in the referral letter                                                                                                                                                                                                                                                                                                         |
| <b>Nutrition</b>                     | A dietetic assessment prior to referral is mandatory. Offer appropriate nutritional support (e.g. protein supplements and/or NGT feeding)                                                                                                                                                                                                                              |
| <b>Metabolic Syndrome</b>            | Request an HbA1c (note anHbA1c may be artificially low in patients with chronic anaemia)<br>For diabetes, document the duration, time on treatment (including years on insulin therapy), urinalysis, eye examination & fundoscopy, vascular complications.<br>Record other components of metabolic syndrome such as hypertension and dyslipidaemia.                    |
| <b>Non-hepatic cancer</b>            | A history of cancer may not be a contraindication<br>Details of dates of diagnosis, staging, treatment, prognosis, 5 year survival and correspondence from treating oncologist                                                                                                                                                                                         |
| <b>Infectious Disease</b>            | Any communicable disease (including TB) in the patient and household contacts should be reported                                                                                                                                                                                                                                                                       |
| <b>Social Support</b>                | Housing, next of kin, adherence with appointments, tests and therapies should be included in the referral letter                                                                                                                                                                                                                                                       |
| <b>Disabilities</b>                  | Learning disabilities or deafness/ visual impairment does not prevent assessment for transplantation                                                                                                                                                                                                                                                                   |
| <b>Alcohol &amp; substance abuse</b> | Alcohol, illicit and prescribed drug usage including analgesics and sedatives, must be reported                                                                                                                                                                                                                                                                        |
| <b>Mental health</b>                 | Prior history and treatment for mental illness, including self-harm should be detailed in the referral letter                                                                                                                                                                                                                                                          |
| <b>Smoking</b>                       | Active smokers should be advised to stop and be referred to smoking cessation service                                                                                                                                                                                                                                                                                  |
