# Supplementary material for: Adult liver transplantation: A UK clinical guideline - part 1: pre-operation
Source: PubMed Central journal article supplement — Frontline Gastroenterol. 2020 Feb 25;11(5):375–84. doi: 10.1136/flgastro-2019-101215 (PMC7447286; doi:10.1136/flgastro-2019-101215), 2020-02-25
Supplement: flgastro-2019-101215supp006.pdf [file flgastro-2019-101215supp006.pdf]

### Appendix 6: The Liver Transplant Multi-disciplinary Assessment (Co-ordinated and overseen by Transplant Co-ordinator)

| <b>The Medical Assessment:</b>     |                                                                                                                                                                                                                                                                     |                                                                                                                                                                                    |
|------------------------------------|---------------------------------------------------------------------------------------------------------------------------------------------------------------------------------------------------------------------------------------------------------------------|------------------------------------------------------------------------------------------------------------------------------------------------------------------------------------|
| Hepatologist                       | General health                                                                                                                                                                                                                                                      | Past medical history, current (non hepatological) medical issues, medication etc (see Table 3)                                                                                     |
|                                    | Liver disease                                                                                                                                                                                                                                                       | Confirm history of liver disease, diagnosis, management and current treatment.<br>Disease-specific evaluations (see Table 4)<br>(If hepatocellular cancer present, oncology input) |
|                                    | Drug History                                                                                                                                                                                                                                                        | To include allergies                                                                                                                                                               |
|                                    | Urine tests                                                                                                                                                                                                                                                         | Glucose, protein, drug-screen (if relevant)                                                                                                                                        |
|                                    | Blood tests                                                                                                                                                                                                                                                         | Liver tests (non-invasive liver screen, synthetic function), renal function, viral screen blood-typing                                                                             |
|                                    | Cardio-pulmonary                                                                                                                                                                                                                                                    | ECG, PFTs and echocardiography (if not recently performed). Further testing, such as stress testing etc with advice from cardiologist (see Tables 3)                               |
|                                    | Radiology                                                                                                                                                                                                                                                           | CXR, USS liver and CT/MRI depending on indication etc (see Tables 3)                                                                                                               |
|                                    | Cancer risk                                                                                                                                                                                                                                                         | Breast/Colon/Cervix where appropriate                                                                                                                                              |
|                                    | Latent infection                                                                                                                                                                                                                                                    | CMV status pre-transplant and post transplant prophylaxis<br>HBV etc<br>HIV status and treatment related issues                                                                    |
|                                    | Explanation                                                                                                                                                                                                                                                         | Explanation of process, all outcomes etc                                                                                                                                           |
| <b>The Surgical Assessment:</b>    |                                                                                                                                                                                                                                                                     |                                                                                                                                                                                    |
| Surgical team                      | Confirm liver transplant is indicated.<br>Surgical issues: previous abdominal surgery, obesity, portal vein compromise, anatomical variants<br>Discussion of procedure, risks, complications and organ issues.                                                      |                                                                                                                                                                                    |
| <b>The Dietetic Assessment</b>     |                                                                                                                                                                                                                                                                     |                                                                                                                                                                                    |
| Dietician                          | Assess nutritional status, including anthropometry<br>Assess patient (and family) understanding of nutritional advice.<br>Co-ordinate with dietetic service at referring hospital                                                                                   |                                                                                                                                                                                    |
| <b>The Anaesthetic Assessment</b>  |                                                                                                                                                                                                                                                                     |                                                                                                                                                                                    |
| Anaesthetist                       | Previous anaesthetic issues.<br>Standard tests include Pulmonary function tests and Oxygen saturation.<br>Risk assessment including specific cardiopulmonary issues.<br>May request CPEX or DSE etc<br>Discussion with patient/family over ICU, surgery process etc |                                                                                                                                                                                    |
| <b>The Psychosocial Assessment</b> |                                                                                                                                                                                                                                                                     |                                                                                                                                                                                    |
| Social Worker                      | Psychosocial issues, family/support mechanisms, effect on dependants etc                                                                                                                                                                                            |                                                                                                                                                                                    |
| Addiction specialist               | Tobacco, alcohol and illicit drug dependencies                                                                                                                                                                                                                      |                                                                                                                                                                                    |
| Psychologist                       | Mental health issues, addiction support etc                                                                                                                                                                                                                         |                                                                                                                                                                                    |
